# Supplementary material for: A novel amplified double-quenching aptasensor for cocaine detection based on split aptamer and silica nanoparticles
Source: Royal Society of Chemistry journal article supplement (doi:10.1039/c8ay00755a), 2018-01-01
Supplement: c8ay00755a1.pdf [file c8ay00755a1.pdf]

## **A novel amplified double-quenching aptasensor for cocaine detection based on split aptamer and silica nanoparticles**

Khalil Abnous<sup>a,b,‡</sup>, Noor Mohammad Danesh<sup>c,‡</sup>, Mohammad Ramezani<sup>a</sup>, Seyed Mohammad Taghdisi<sup>d,e,\*</sup>, Ahmad Sarreshtehdar Emrani<sup>f,\*</sup>

<sup>a</sup>Pharmaceutical Research Center, Pharmaceutical Technology Institute, Mashhad University of Medical Sciences, Mashhad, Iran.

<sup>b</sup>Department of Medicinal Chemistry, School of Pharmacy, Mashhad University of Medical Sciences, Mashhad, Iran

<sup>c</sup>Research Institute of Sciences and New Technology, Mashhad, Iran.

<sup>d</sup>Targeted Drug Delivery Research Center, Pharmaceutical Technology Institute, Mashhad University of Medical Sciences, Mashhad, Iran.

<sup>e</sup>Department of Pharmaceutical Biotechnology, School of Pharmacy, Mashhad University of Medical Sciences, Mashhad, Iran

<sup>f</sup>Cardiovascular Research Center, School of Medicine, Mashhad University of Medical Sciences, Mashhad, Iran

<sup>‡</sup> These authors contributed equally to the work.

\* Corresponding authors: Dr. Seyed Mohammad Taghdisi (taghdisihm@mums.ac.ir) and Dr. Ahmad Sarreshtehdar Emrani (ahmad\_sarreshtedar@yahoo.com), Tel.: +98 513 1801203, Fax.: +98 513 882 3251

a)

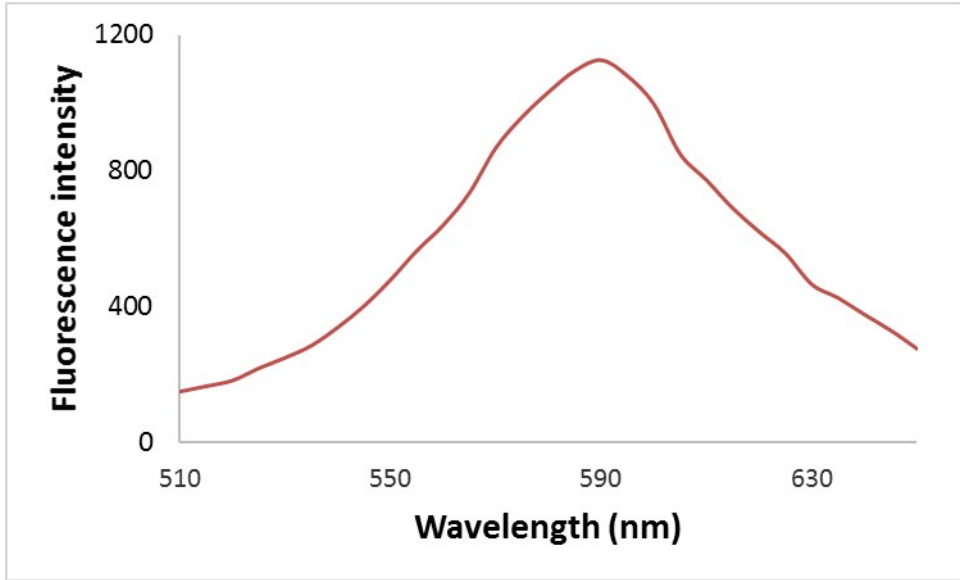

b)

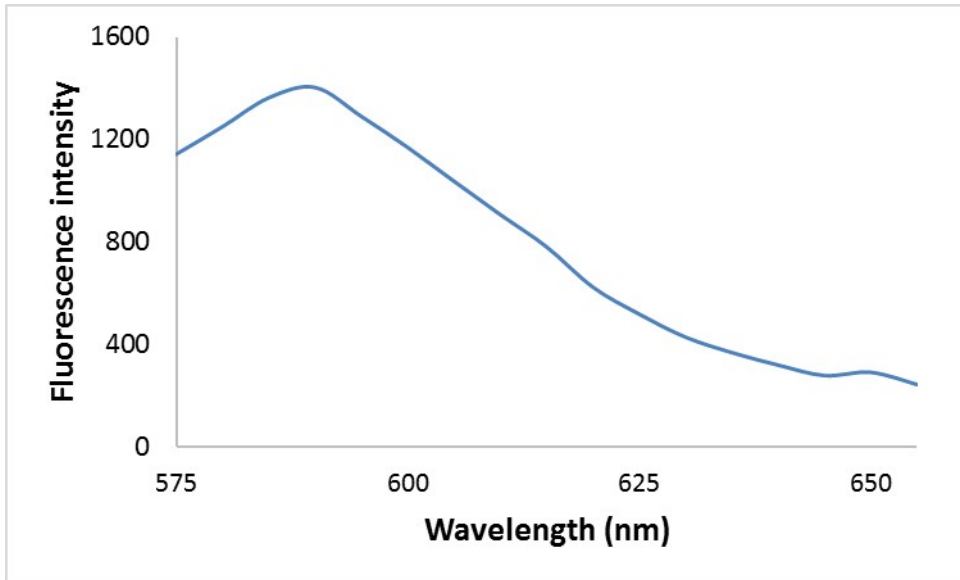

c)

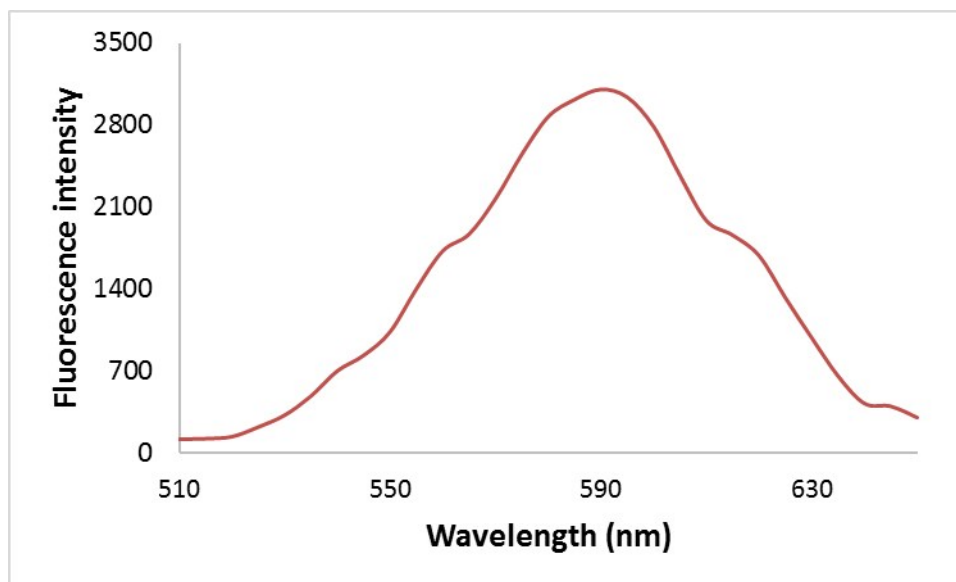

d)

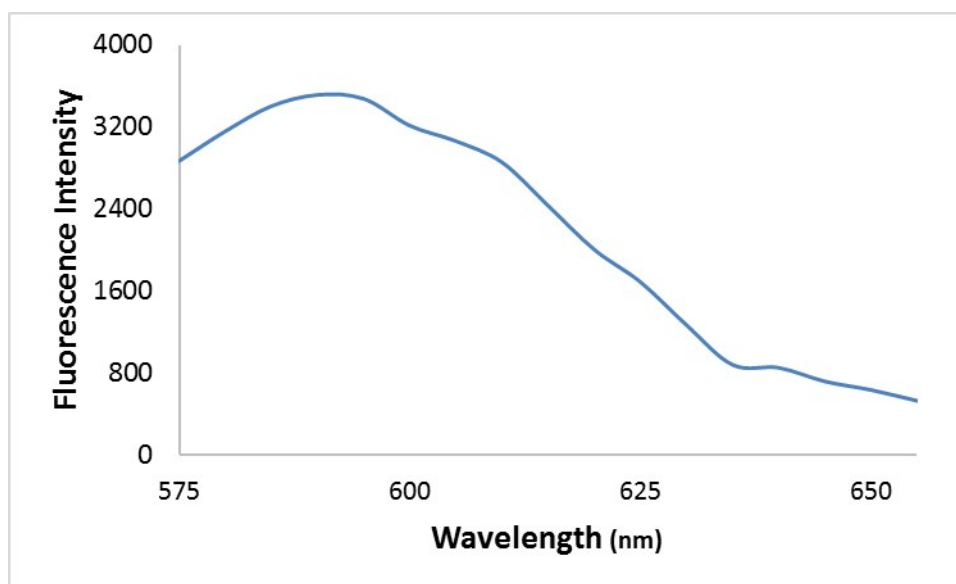

Fig. S1. Fluorescence spectra of various fluorophores (FAM and TAMRA) in the absence and presence of cocaine (80 nM). (a) Fluorescence spectra of the aptasensor in the absence of target with  $\lambda_{Ex}$  = 490 nm which is specific for FAM. The emission of FAM ( $\lambda_{Em}$  = 520 nm) was measured to be about 182. (b) Fluorescence spectra of the aptasensor in the absence of target with  $\lambda_{Ex}$  = 555 nm which is specific for TAMRA. The emission of TAMRA ( $\lambda_{Em}$  = 590 nm) was measured to be about 1400. (c) Fluorescence spectra of the aptasensor in the presence of target with  $\lambda_{Ex}$  = 490 nm which is specific for FAM. The emission of FAM ( $\lambda_{Em}$  = 520 nm) was measured to be about 140. (d) Fluorescence spectra of the aptasensor in the presence of target with  $\lambda_{Ex}$  = 555 nm which is specific for TAMRA. The emission of TAMRA ( $\lambda_{Em}$  = 590 nm) was measured to be about 3500.
